# Supplementary material for: Combined XRD and infrared studies of pyridinium species in (PyH)3[PW12O40] single crystals
Source: Royal Society of Chemistry journal article supplement (doi:10.1039/c0cp00446d), 2010-10-28
Supplement: c0cp00446d.pdf [file c0cp00446d.pdf]

# Combined XRD and Infrared Study of pyridinium species in (PyH)<sub>3</sub>[PW<sub>12</sub>O<sub>40</sub>] Single Crystals

Céline Pichon, Pierre Mialane, Jérôme Marrot, Claude Binet, Alexandre Vimont, Arnaud  
Travert, and Jean-Claude Lavalley

## Supplementary Information

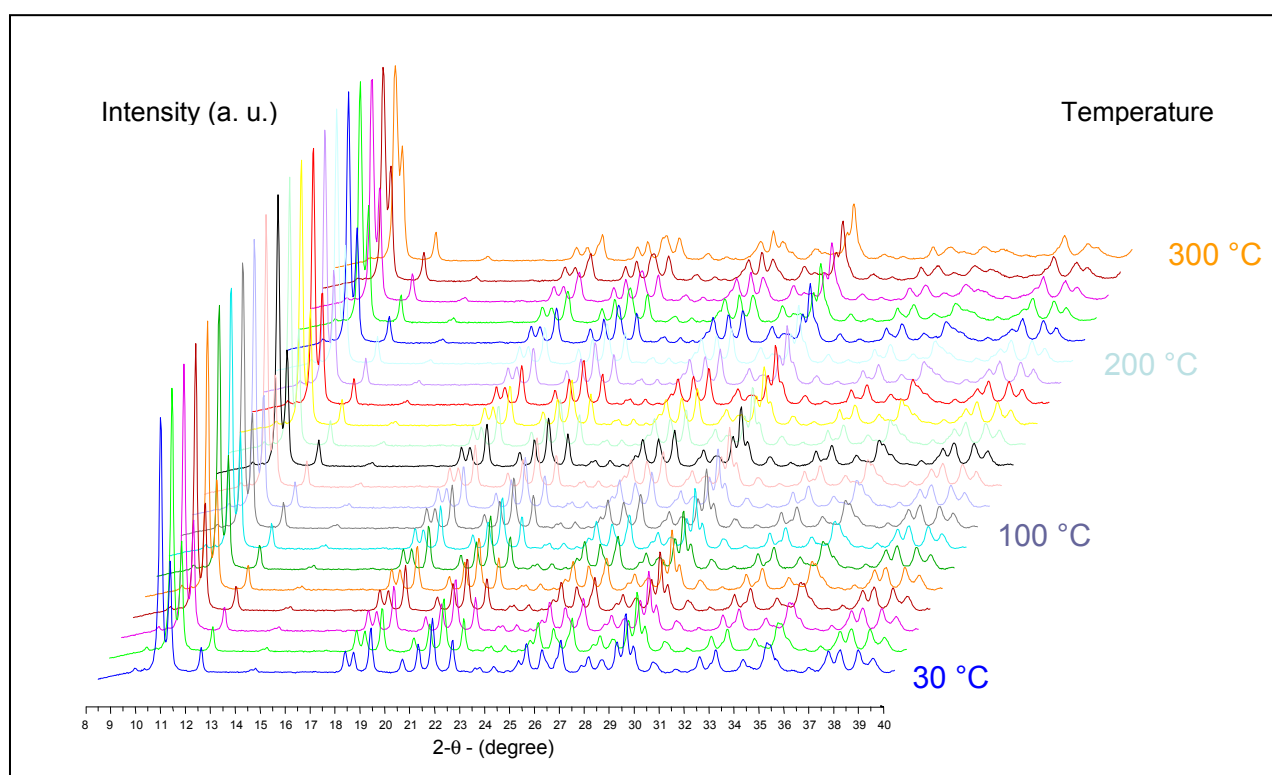

Figure S1 : Powder X-ray thermodiffractograms of **2** (from 30 °C to 160 °C every 10 °C and from 180 °C to 300 °C every 20 °C).

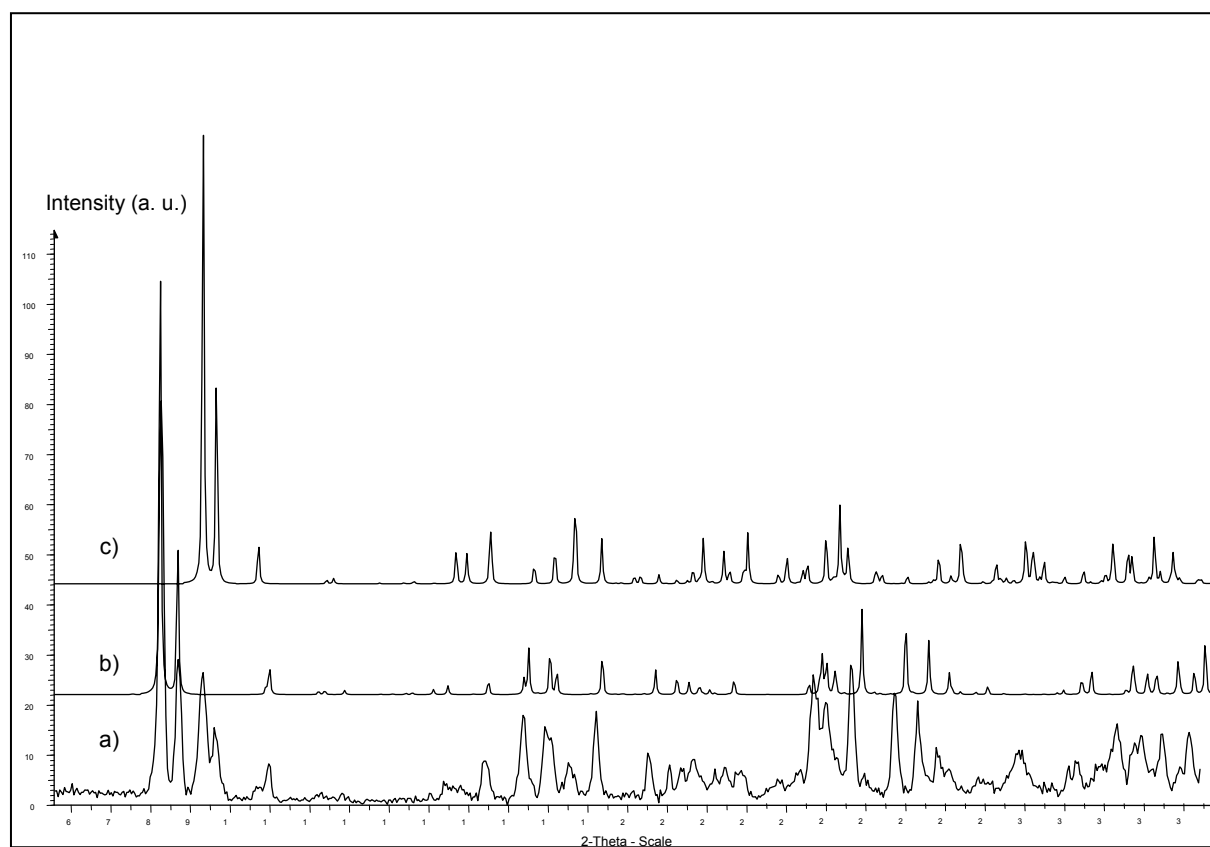

Figure S2: (a) Experimental powder X-ray diffraction data of **1** after exposure to air three days at room temperature; (b) the calculated X-ray powder diffractogram deduced from the single crystal X-ray diffraction study of **1**; (c) the calculated X-ray powder diffractogram deduced from the single crystal X-ray diffraction study of **2**.
